# Supplementary material for: Nanocellulose assisted preparation of ambient dried, large-scale and mechanically robust carbon nanotube foams for electromagnetic interference shielding
Source: Royal Society of Chemistry journal article supplement (doi:10.1039/d0ta05961g), 2020-01-01
Supplement: d0ta05961g1.pdf [file d0ta05961g1.pdf]

## Supporting Information

### Nanocellulose Assisted Preparation of Ambient Dried, Large-Scale and Mechanically

### Robust Carbon Nanotube Foams for Electromagnetic Interference Shielding

Zhihui Zeng,<sup>a</sup> Changxian Wang,<sup>b</sup> Tingting Wu,<sup>a</sup> Daxin Han,<sup>c</sup> Mirko Luković,<sup>a</sup> Fei Pan,<sup>d</sup>  
Gilberto Siqueira\*,<sup>a</sup> and Gustav Nyström\*,<sup>a, e</sup>

<sup>a</sup> Laboratory for Cellulose and Wood Materials, Swiss Federal Laboratories for Materials Science and Technology (Empa), 8600 Dübendorf, Switzerland

<sup>b</sup> School of Materials Science and Engineering, Nanyang Technological University, 50 Nanyang Avenue, 639798 Singapore, Singapore

<sup>c</sup> Department of Information Technology and Electrical Engineering, Swiss Federal Institute of Technology in Zurich (ETH Zürich), 8092 Zürich, Switzerland

<sup>d</sup> Laboratory for Biointerfaces, Swiss Federal Laboratories for Materials Science and Technology (Empa), 9041 St. Gallen, Switzerland

<sup>e</sup> Department of Health Science and Technology, Swiss Federal Institute of Technology in Zurich (ETH Zürich), 8092 Zürich, Switzerland

\*Email: [Gilberto.Siqueira@empa.ch](mailto:Gilberto.Siqueira@empa.ch) (G.S.), [Gustav.Nystroem@empa.ch](mailto:Gustav.Nystroem@empa.ch) (G. N.)

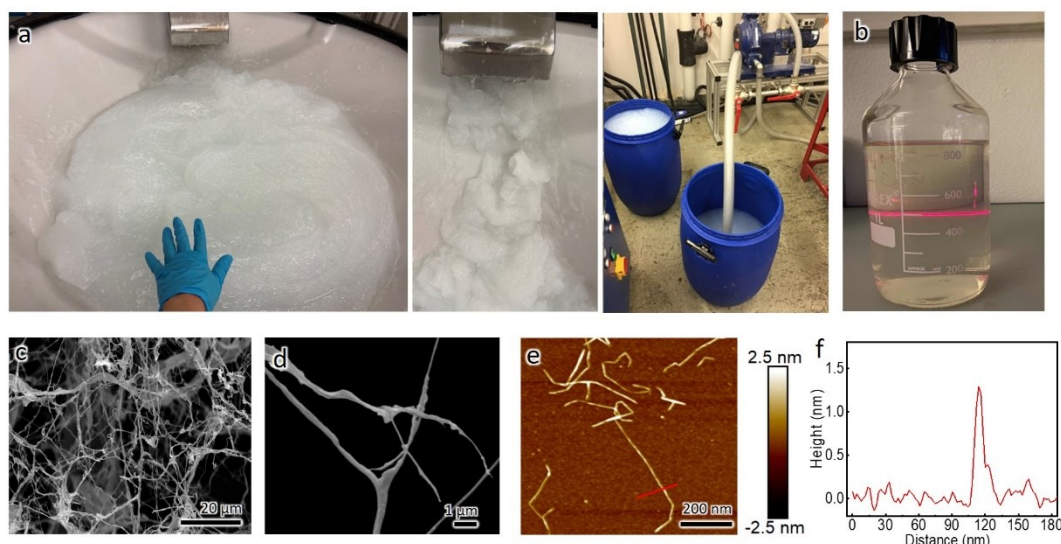

**Fig. S1.** Properties of large scale produced NFC. (a) Optical images of the mass-produced NFCs dispersion during the grinding process. (b) Typical Tyndall effect upon a laser pass through the dispersions. (c, d) SEM images of the NFCs. (e) AFM image of the NFCs and (f) corresponding height profile of the line in image e, showing the ultrathin dimension and large aspect ratio of NFCs.

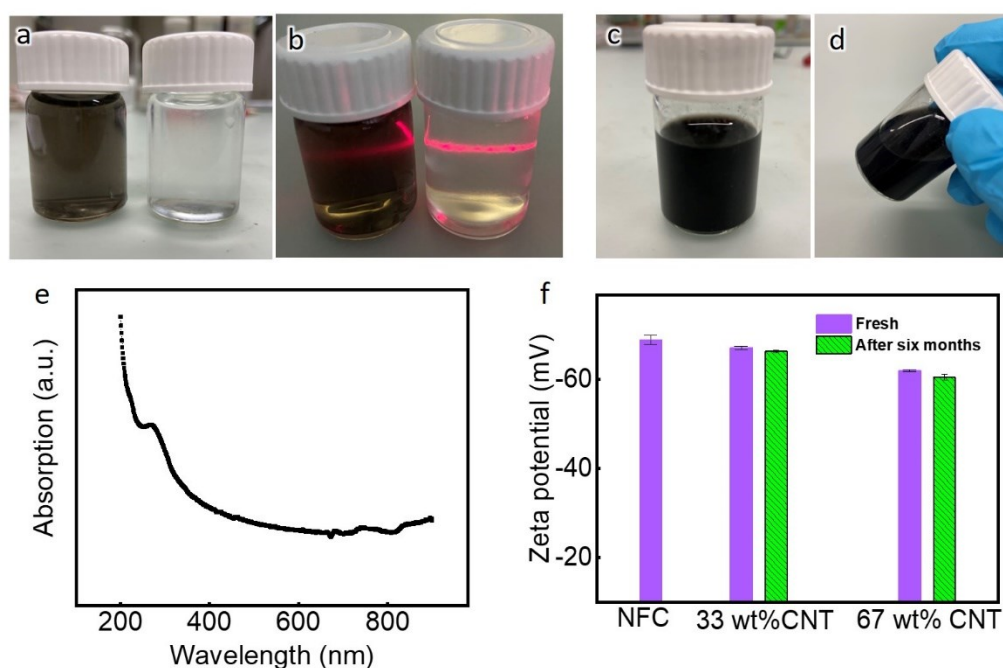

**Fig. S2.** Properties of the CNT dispersions. Optical images of (a) CNT/33 wt% NFC (left) and NFC (right) dispersions and (b) the Tyndall effect upon a laser pass through the dispersions. Optical images of CNT/33 wt% NFC dispersion (c) before and (d) after storing for six months. (e) Typical UV-vis spectrum of the as-prepared CNT dispersion. (f) Zeta potential of the CNT based dispersions with various NFC contents before and after storing for six months.

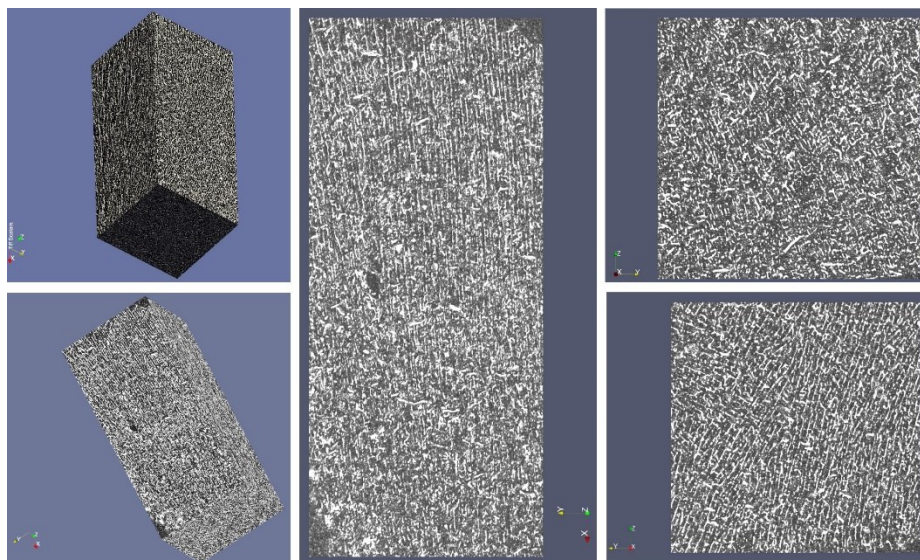

**Fig. S3.** X-ray tomography of the air-dried CNT foams and corresponding 2D projection images in the 3D structure, many of which were used to reconstruct the 3D networks.

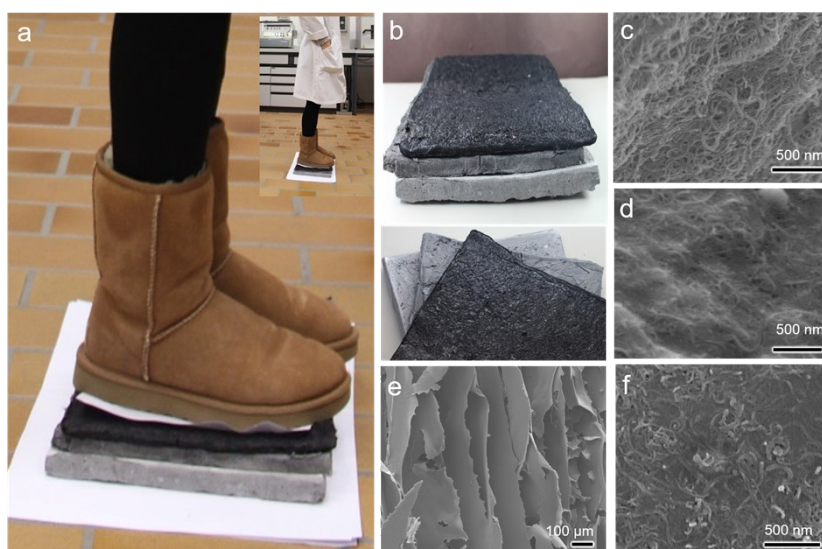

**Fig. S4.** (a, b) Optical images of large-area air-dried CNT based foams (with 33 wt% NFC, 75 wt%, and 95 wt% NFC) that sustain a person weighing 45 kg at a density of around 20 mg/cm<sup>3</sup>. SEM images of the air-dried CNT foams with (c) 33 wt% NFC, (d) 50 wt% NFC, and (e, f) 75 wt% NFC at a similar density of 18 mg/cm<sup>3</sup>.

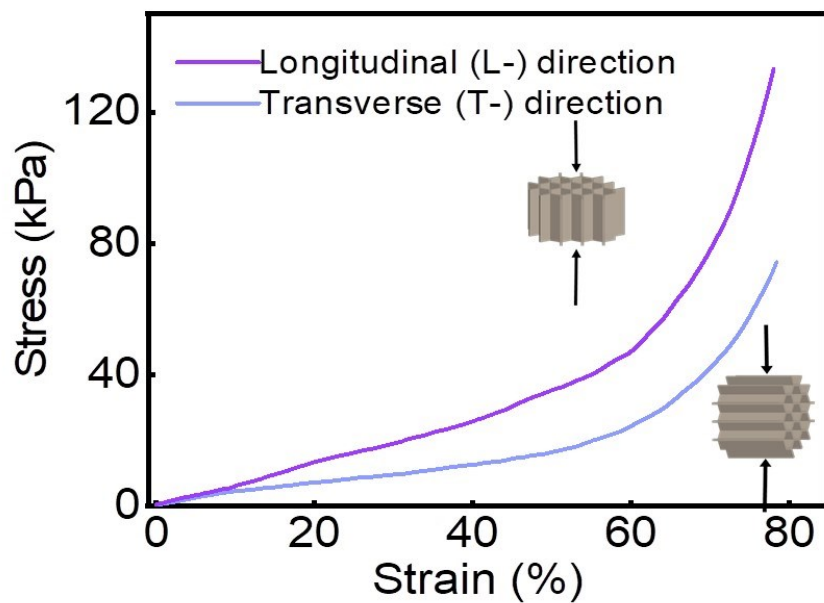

**Fig. S5.** Longitudinal and transverse compressive curves of the air-dried CNT foams (33 wt% NFC, density of 18 mg/cm<sup>3</sup>).

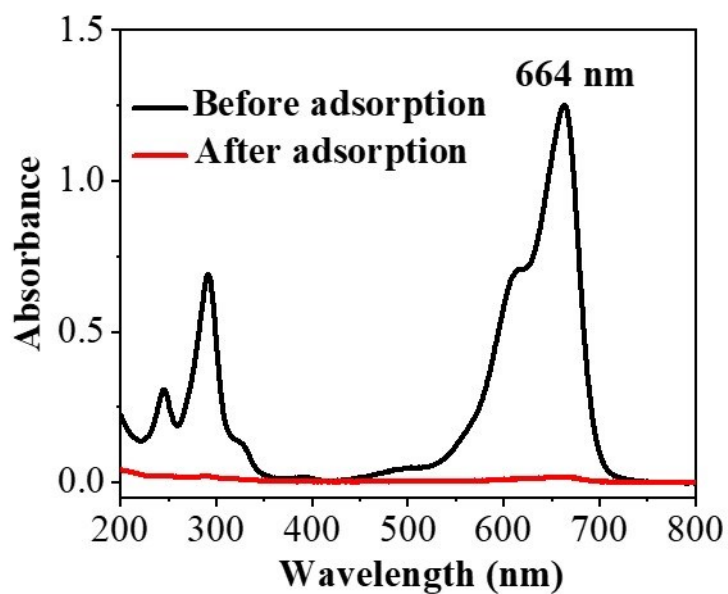

**Fig. S6.** UV curves of the MB solution before and after adsorption by the air-dried CNT based foams.

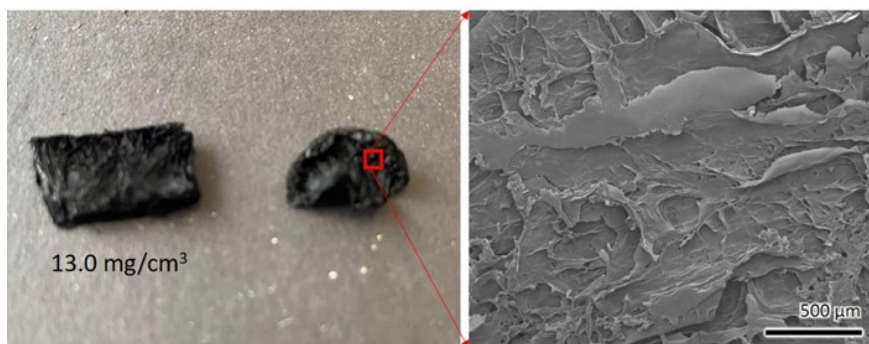

**Fig. S7.** Optical and SEM images of the air-dried CNT foam with 13 mg/cm<sup>3</sup> (left) and the sample prepared from a too low concentration of precursor dispersion (for preparing the foams with a density of 8 mg/cm<sup>3</sup>) such that it shows significant volume shrinkage upon drying.

**Table S1.** Relationship among EMI SE, attenuation, and transmission efficiency (T).

| EMI SE<br>(dB) | Attenuation<br>(%) | T<br>(%) |
|----------------|--------------------|----------|
| 10             | 90                 | 10       |
| 20             | 99                 | 1        |
| 30             | 99.9               | 0.1      |
| 40             | 99.99              | 0.01     |
| 50             | 99.999             | 0.001    |
| 60             | 99.9999            | 0.0001   |
| 70             | 99.99999           | 0.00001  |
| 80             | 99.999999          | 0.000001 |

**Table S2.** Properties of the air-dried CNT foams (density of 18 mg/cm<sup>3</sup>) at various NFC contents.

| NFC content (wt %) | CNT content (wt%) | CNT volume content (vol%) | Conductivity (S/m) |
|--------------------|-------------------|---------------------------|--------------------|
| 33                 | 67                | 0.70                      | 5.1                |
| 50                 | 50                | 0.49                      | 1.7                |
| 67                 | 33                | 0.30                      | 0.7                |
| 75                 | 25                | 0.22                      | /                  |
| 100                | 0                 | 0                         | /                  |

**Table S3.** Properties of the air-dried CNT foams (33 wt% NFC) at various densities.

| Density (mg/cm <sup>3</sup> ) | Porosity | CNT volume content (vol%) | Weight reduction (%) | Conductivity (S/m) |
|-------------------------------|----------|---------------------------|----------------------|--------------------|
| 63                            | 0.958    | 2.59                      | 95.8                 | 9.5                |
| 28                            | 0.981    | 1.08                      | 98.1                 | 6.4                |
| 18                            | 0.988    | 0.70                      | 98.8                 | 5.1                |
| 13                            | 0.991    | 0.50                      | 99.1                 | 3.4                |

**Table S4. EMI shielding performance of some typical shielding materials.**

| Materials                                                      | EMI SE (dB) | Density (mg/cm <sup>3</sup> ) | Thickness (mm) | Density normalized specific SE (dB·cm <sup>3</sup> /g) | SSE (dB·cm <sup>2</sup> /g) |
|----------------------------------------------------------------|-------------|-------------------------------|----------------|--------------------------------------------------------|-----------------------------|
| <b>Carbon-based porous and solid shields</b>                   |             |                               |                |                                                        |                             |
| CNF/PS foam <sup>1</sup>                                       | 19          | /                             | /              | /                                                      | /                           |
| CNT/PS foam <sup>2</sup>                                       | 19          | 574                           | /              | 33.1                                                   | /                           |
| Graphene/PVDF foam <sup>3</sup>                                | 28          | /                             | /              | /                                                      | /                           |
| Graphene/PMMA foam <sup>4</sup>                                | 19          | 792                           | 2.4            | 24                                                     | 100                         |
| Graphene/PS foam <sup>5</sup>                                  | 29          | 450                           | 2.5            | 64.4                                                   | 258                         |
| Graphene/PEI foam <sup>6</sup>                                 | 9-12.8      | ~290                          | 2.3            | 31–44                                                  | 135–192                     |
| Graphene@Fe <sub>3</sub> O <sub>4</sub> /PEI foam <sup>7</sup> | 15-18       | 400                           | 2.5            | 37.5–44                                                | 150–176                     |
| CF/PP foam <sup>8</sup>                                        | 25          | 735                           | 3.1            | 34                                                     | 109                         |
| Stainless-steel fiber/PP foam <sup>9</sup>                     | 48          | 640                           | 3.1            | 75                                                     | 242                         |
| MWCNT/PLA foam <sup>10</sup>                                   | 23          | 299                           | 2.5            | 77                                                     | 308                         |
| MWCNT/PVDF foam <sup>11</sup>                                  | 57          | 750                           | 2              | 76                                                     | 380                         |
| MWCNT/WPU foam <sup>12</sup>                                   | 23.0        | 20                            | 2.3            | 1148                                                   | 4991                        |
|                                                                | 21.1        | 39                            | 1              | 541                                                    | 5410                        |
| MWCNT/cellulose aerogel <sup>13</sup>                          | 20-35       | ~37-47                        | 2.5            | 425-944                                                | 1700-3776                   |
| Cellulose aerogel coated with MWCNT <sup>13</sup>              | 35-40       | ~69-75                        | 2.5            | 466-519                                                | 1864-2078                   |
| Graphene foam based PDMS foam <sup>14</sup>                    | 30          | 60                            | 1              | ~500                                                   | ~5000                       |
| Graphene foam/CNT/PDMS <sup>15</sup>                           | 75          | 90                            | 2              | 833                                                    | 4165                        |

|                                                          |           |      |           |           |            |
|----------------------------------------------------------|-----------|------|-----------|-----------|------------|
| Graphene-coated PU foam <sup>16</sup>                    | 19.9      | 30.0 | 20        | 663.3     | 3320       |
| Graphene foam coated with PEDOT:PSS <sup>17</sup>        | 69.1      | 22.1 | 1.5       | 3124      | 20837      |
| Graphene based composite aerogel <sup>18</sup>           | 37        | 70   | 3         | 529       | 1762       |
| Sponged-supported RGO aerogel <sup>19</sup>              | 24        | 16.7 | 12        | 1437      | 1198       |
| CNT/multi-layered graphene foam <sup>20</sup>            | ~38       | 5.8  | 1.6       | 6600      | ~40000     |
| Graphene aerogel <sup>21</sup>                           | 22.3      | 4.5  | 2         | 4956      | 24778      |
| Carbon foam-CNT/carbon fiber foam <sup>22</sup>          | 21        | 12.4 | 5.0       | 1690      | 3370       |
| CNF mat <sup>23</sup>                                    | 81.1      | 219  | 4.6       | 370       | 804.3      |
|                                                          | 52.2      | 134  | 2.9       | 390       | 1361.6     |
| Carbon/Graphene foam <sup>24</sup>                       | 24        | 721  | 0.024     | 33.3      | 13889      |
| Phthalonitrile-based carbon foam <sup>25</sup>           | 51.2      | 150  | 2         | 341.1     | 1707       |
| Commercial carbon foam <sup>26</sup>                     | 40        | 166  | 2         | 241       | 1250       |
| CNT sponge <sup>27</sup>                                 | 22        | 20   | 2.38      | 1100      | 4622       |
| MWCNT/PTT <sup>28</sup>                                  | 22        | /    | 2         |           | /          |
| MWCNT/PP <sup>29</sup>                                   | 24        | 899  | 2.8       | ~26.7     | 95         |
|                                                          | 35        | /    | 1.0       | /         | /          |
| CNF sponge/Epoxy <sup>30</sup>                           | 40        | /    | 2         | /         | /          |
| MWCNT/ABS <sup>31</sup>                                  | 50        | 1050 | 1.1       | ~47.6     | 433        |
| Carbon black (CB)/ABS <sup>31</sup>                      | 22        | /    | 1.1       | ~20.9     | ~190       |
| Carbon nanofiber (CNF)/ABS <sup>31</sup>                 | 35        | /    | 1.1       | /         | /          |
| MWCNT/PC <sup>32</sup>                                   | 25        | 1200 | 1.85      | /         | 112        |
| MWCNT/PS <sup>33</sup>                                   | 60        | /    | 2         | ~57       | 285        |
| MWCNT/WPU <sup>34</sup>                                  | 24-50     | 1200 | 0.05-0.32 | 20-42     | 3408       |
| SWCNT/epoxy <sup>35</sup>                                | 25        | 1748 | 2         | ~14.3     | 72         |
| SWCNT/PU <sup>36</sup>                                   | 18        | /    | 2         | ~17       | 80         |
| Graphene/WPU <sup>37</sup>                               | 32        |      | 2         | ~30.5     | 153        |
| CB/EPDM <sup>38</sup>                                    | 18        | /    | 5.5       | /         |            |
| Flexible Graphite <sup>39</sup>                          | 110       | 1100 | 0.2       | 100       | 500        |
| <b>Metal-based porous and solid shields</b>              |           |      |           |           |            |
| CuNi foam <sup>40</sup>                                  | 15-25     | ~240 | 1.5       | 63-104    | 420-690    |
| CuNi-CNT foam <sup>40</sup>                              | 40-54.6   | ~230 | 1.5       | 174-237   | 116-1580   |
| Porous cellulose papers coated with Ag NWs <sup>41</sup> | 48.6      | 530  | 0.164     | 91.7      | 5584       |
| Ag NWs/PI foam <sup>42</sup>                             | 17-23.5   | 22   | 5         | 1068-772  | 2136 -1544 |
| Ag NWs/WPU foam <sup>43</sup>                            | 20.0-64.0 | 8.0  | 2.3       | 2500-1422 | 10970-6184 |
| Ag NW@C hybrid sponge <sup>44</sup>                      | 37.9      | 3.8  | 1         | 9921      | 99214      |

|                                               |       |       |        |      |        |
|-----------------------------------------------|-------|-------|--------|------|--------|
| Cu NWs aerogels <sup>45</sup>                 | ~17   |       | 9.46   | /    | /      |
| Cu NW@ graphene aerogels <sup>45</sup>        | 52.5  | 166   | 9.46   | 3170 | 3921.8 |
| Copper <sup>46</sup>                          | 90    | 8960  | 3.1    | 10   | 32     |
| Nickel <sup>46</sup>                          | 82    | 8900  | /      | 9.2  |        |
| Stainless steel <sup>46</sup>                 | 89    | 8100  | 4      | 11   | 28     |
| (2 μm) Ni fibers/PES <sup>46</sup>            | 58    | 1871  | 2.85   | 31   | 109    |
| (20 μm) Ni fibers/PES <sup>46</sup>           | 4     | 250   | 2.85   | 16   |        |
| Ni filaments/PES <sup>45</sup>                | ~87   | /     | 2.85   | 47   | 165    |
| Aluminium flakes/PES <sup>47</sup>            | 35-39 | /     | 2.92   | /    | /      |
| Ag NW/epoxy <sup>48</sup>                     | 25.09 | 1255  | 0.040  | 20.0 | 5018   |
| Ag NP/epoxy <sup>48</sup>                     | 5.06  | 1234  | 0.040  | 4.1  | 1012   |
| Ag NW/PVA <sup>48</sup>                       | 30.1  | 1123  | 0.040  | 26.8 | 6691   |
| Ag NW/PS <sup>49</sup>                        | 31.85 | 1051  | 0.8    | 30.3 | 379    |
| Cu NW/PS <sup>50</sup>                        | 35    | 1051  | 0.21   | 33.3 | 158.7  |
| <b>MXene based cellular and solid shields</b> |       |       |        |      |        |
| MXene foam <sup>51</sup>                      | 32    | 390   | 0.006  | 82   | 137000 |
| MXene-POSS-NH2 aerogel <sup>52</sup>          | 34.5  | /     | 2      | /    | /      |
| MXene/PVA aerogel <sup>53</sup>               | 28    | 10.8  | 5      | 2586 | 5136   |
| MXene/SA film <sup>54</sup>                   | 57    | ~2317 | 0.008  | 24.6 | 30830  |
| MXene/Nanocellulose film <sup>55</sup>        | 24    | 2000  | 0.047  | 12   | 2647   |
|                                               | 25    | 1136  | 0.0167 | 22   | 1326   |
| MXene@PS solids <sup>56</sup>                 | 62    | 1051  | 2      | 59.0 | 29.5   |
| MXene/RGO-epoxy solid <sup>57</sup>           | 56.4  | /     | 2      | /    | /      |

/: unclear or uncalculated value; the numbers in the square brackets denote the numbers of references which are at the end of the supporting information.

**Table S5.** Properties of the air-dried CNT foam (33 wt% NFC) and corresponding compressed state (C-CNT).

| Sample name | Density (mg/cm <sup>3</sup> ) | Thickness mm | Porosity | CNT volume content (vol%) | Conductivity (S/m) |
|-------------|-------------------------------|--------------|----------|---------------------------|--------------------|
| CNT foam    | 18                            | 2.0          | 0.988    | 0.70                      | 5.1                |
| C-CNT       | 450                           | 0.08         | 0.700    | 17.4                      | 420.8              |

1. Y. Yang, M. C. Gupta, K. L. Dudley, R. W. Lawrence, *Adv. Mater.* 2005, **17**, 1999.



2. Y. Yang, M. C. Gupta, K. L. Dudley, R. W. Lawrence, *Nano Lett.* 2005, **5**, 2131.
3. V. Eswaraiah, V. Sankaranarayanan, S. Ramaprabhu, *Macrom. Mater. Engineer.* 2011, **296**, 894.
4. H. B. Zhang, Q. Yan, W. G. Zheng, Z. He, Z. Z. Yu, *ACS Appl. Mater. Interf.* 2011, **3**, 918.
5. D. X. Yan, P. G. Ren, H. Pang, Q. Fu, M. B. Yang, Z. M. Li, *J. Mater. Chem.* 2012, **22**, 18772.
6. J. Ling, W. Zhai, W. Feng, B. Shen, J. Zhang, W. Zheng, *ACS Appl. Mater. Interf.* 2013, **5**, 2677.
7. B. Shen, W. Zhai, M. Tao, J. Ling, W. Zheng, *ACS Appl. Mater. Interf.* 2013, **5**, 11383.
8. A. Ameli, P. U. Jung, C. B. Park, *Carbon* 2013, **60**, 379.
9. A. Ameli, M. Nofar, S. Wang, C. B. Park, *ACS Appl. Mater. Interf.* 2014, **6**, 11091.
10. T. Kuang, L. Chang, F. Chen, Y. Sheng, D. Fu, X. Peng, *Carbon* 2016, **105**, 305.
11. H. Wang, K. Zheng, X. Zhang, X. Ding, Z. Zhang, C. Bao, L. Guo, L. Chen, X. Tian, *Compos. Sci. Technol.* 2016, **125**, 22.
12. Z. Zeng, H. Jin, M. Chen, W. Li, L. Zhou, Z. Zhang, *Adv. Funct. Mater.* 2016, **26**, 303.
13. L. Q. Zhang, S. G. Yang, L. Li, B. Yang, H. D. Huang, D. X. Yan, G. J. Zhong, L. Xu, Z. M. Li, *ACS Appl. Mater. Interf.* 2018, **10**, 40156.
14. Z. Chen, C. Xu, C. Ma, W. Ren, H. M. Cheng, *Adv. Mater.* 2013, **25**, 1296.
15. Sun, X.; Liu, X.; Shen, X.; Wu, Y.; Wang, Z.; Kim, J.-K. *Comp. Part A: Appl. Sci. Manufact.* 2016, **85**, 199-206.
16. Shen, B.; Li, Y.; Zhai, W.; Zheng, W. *ACS Appl. Mater. Interf.* 2016, **8**, 8050.
17. Y. Wu, Z. Wang, X. Liu, X. Shen, Q. Zheng, Q. Xue, J. K. Kim, *ACS Appl. Mater. Interf.* 2017, **9** (10), 9059.
18. W. L. Song, X. T. Guan, L. Z. Fan, W. Q. Cao, C. Y. Wang, M. S. Cao, *Carbon* 2015, **93**, 151.

19. C. Liu, S. Ye, J. Feng, *Chem. Asian J.* 2016, **11**, 2586.
20. Q. Song, F. Ye, X. Yin, W. Li, H. Li, Y. Liu, K. Li, K. Xie, X. Li, Q. Fu, L. Cheng, L. Zhang, B. Wei, *Adv. Mater.* 2017, **29**, 1701583.
21. Z. Zeng, C. Wang, Y. Zhang, P. Wang, S. I. Seyed Shahabadi, Y. Pei, M. Chen, X. Lu, *ACS Appl. Mater. Interf.* 2018, **10**, 8205.
22. O. Pitkanen, J. Tolvanen, I. Szenti, A. Kukovecz, J. Hannu, H. Jantunen, K. Kordas, *ACS Appl. Mater. Interf.* 2019, **11**, 19331.
23. X. Hong, D. D. L. Chung, *Carbon* 2017, **111**, 529.
24. Y. Li, B. Shen, X. Pei, Y. Zhang, D. Yi, W. Zhai, L. Zhang, X. Wei, W. Zheng, *Carbon* 2016, **100**, 375.
25. L. Zhang, M. Liu, S. Roy, E. Chu, K. See, X. Hu, *ACS Appl. Mater. Interf.* 2016, **8**, 7422.
26. F. Moglie, D. Micheli, S. Laurenzi, M. Marchetti, V. Mariani Primiani, *Carbon* 2012, **50**, 1972.
27. M. Crespo, M. González, A. L. Elías, L. Pulickal Rajukumar, J. Baselga, M. Terrones, J. Pozuelo, *Phys. Stat. Sol. RRL* 2014, **8**, 698.
28. A. Gupta, V. Choudhary, *J Mater. Science* 2011, **46**, 6416.
29. M. H. Al-Saleh, U. Sundararaj, *Carbon* 2009, **47**, 1738.
30. Y. Chen, H.-B. Zhang, Y. Yang, M. Wang, A. Cao, Z.-Z. Yu, *Adv. Funct. Mater.* 2016, **26**, 447.
31. M. H. Al-Saleh, W. H. Saadeh, U. Sundararaj, *Carbon* 2013, **60**, 146.
32. M. Arjmand, M. Mahmoodi, G. A. Gelves, S. Park, U. Sundararaj, *Carbon* 2011, **49**, 3430.
33. M. Arjmand, T. Apperley, M. Okoniewski, U. Sundararaj, *Carbon* 2012, **50**, 5126.
34. Z. Zeng, M. Chen, H. Jin, W. Li, X. Xue, L. Zhou, Y. Pei, H. Zhang, Z. Zhang, *Carbon* 2016, **96**, 768.

35. Y. Huang, N. Li, Y. Ma, F. Du, F. Li, X. He, X. Lin, H. Gao, Y. Chen, *Carbon* 2007, **45**, 1614.
36. Z. Liu, G. Bai, Y. Huang, Y. Ma, F. Du, F. Li, T. Guo, Y. Chen, *Carbon* 2007, **45**, 821.
37. S. T. Hsiao, C. C. M. Ma, H. W. Tien, W. H. Liao, Y. S. Wang, S. M. Li, Y. C. Huang, *Carbon* 2013, **60**, 57.
38. P. Ghosh, A. Chakrabarti. *Europ. Polym. J.* 2000, **36**, 1043.
39. A. A. Eddib, D. D. L. Chung, *Carbon* 2017, **117**, 427.
40. K. Ji, H. Zhao, J. Zhang, J. Chen, Z. Dai, *Appl. Surf. Sci.* 2014, **311**, 351.
41. T. W. Lee, S. E. Lee, Y. G. Jeong, *ACS Appl. Mater. Interf.* 2016, **8**, 13123.
42. J. Ma, M. Zhan, K. Wang, *ACS Appl. Mater. Interf.* 2015, **7**, 563.
- 43.. Z. Zeng, M. Chen, Y. Pei, S.I. Seyed Shahabadi, B. Che, P. Wang, X. Lu, *ACS Appl. Mater. Interf.* 2017, **9**, 32211.
44. Y.-J. Wan, P.-L. Zhu, S.-H. Yu, R. Sun, C.-P. Wong, W.-H. Liao, *Small* 2018, **14**, 1800534.
45. S. Wu, M. Zou, Z. Li, D. Chen, H. Zhang, Y. Yuan, Y. Pei, A. Cao, *Small* 2018, **1800634**.
46. X. Shui, D. D. L. Chung, *J. Electr. Mater.* 1997, **26**, 928.
47. L. Li, D. D. L. Chung, *Composites* 1994, **25**, 215.
48. Y.-H. Yu, C.-C. M. Ma, C.-C. Teng, Y.-L. Huang, S.-H. Lee, I. Wang, M.-H. Wei, *Mater. Chem.Phys.* 2012, **136**, 334.
49. M. Arjmand, A. A. Moud, Y. Li, U. Sundararaj, *RSC Adv.* 2015, **5**, 56590.
50. M. H. Al-Saleh, G. A. Gelves, U. Sundararaj, *Comp. Part A: Appl. Sci. Manufact.* 2011, **42**, 92.
51. J. Liu, H.-B. Zhang, R. Sun, Y. Liu, Z. Liu, A. Zhou, Z.-Z. Yu, *Adv. Mater.* 2017, **29**, 1702367.

52. S. Shi, B. Qian, X. Wu, H. Sun, H. Wang, H.-B. Zhang, Z.-Z. Yu, T. P. Russell, *Angew. Chem. Int. Ed.* 2019, doi.org/10.1002/anie.201908402.
53. H. Xu, X. Yin, X. Li, M. Li, S. Liang, L. Zhang, L. Cheng, *ACS Appl. Mater. Interfaces* 2019, **11**, 10198.
54. F. Shahzad, M. Alhabeab, C. B. Hatter, B. Anasori, S. Man Hong, C. M. Koo, Y. Gogotsi, *Science* 2016, **353**, 1137.
55. W.-T. Cao, F.-F. Chen, Y.-J. Zhu, Y.-G. Zhang, Y.-Y. Jiang, M.-G. Ma, F. Chen, *ACS Nano* 2018, **12**, 4583.
56. R. Sun, H.-B. Zhang, J. Liu, X. Xie, R. Yang, Y. Li, S. Hong, Z.-Z. Yu, *Adv. Funct. Mater.* 2017, **27**, 1702807.
57. S. Zhao, H.-B. Zhang, J.-Q. Luo, Q.-W. Wang, B. Xu, S. Hong, Z.-Z. Yu, *ACS Nano* 2018, **12**, 11193.
